# Supplementary material for: CO2 decomposition in a packed DBD plasma reactor: influence of packing materials
Source: Royal Society of Chemistry journal article supplement (doi:10.1039/c5ra27085e), 2016-01-01
Supplement: c5ra27085e1.pdf [file c5ra27085e1.pdf]

### The electrocal signals of packed materials:

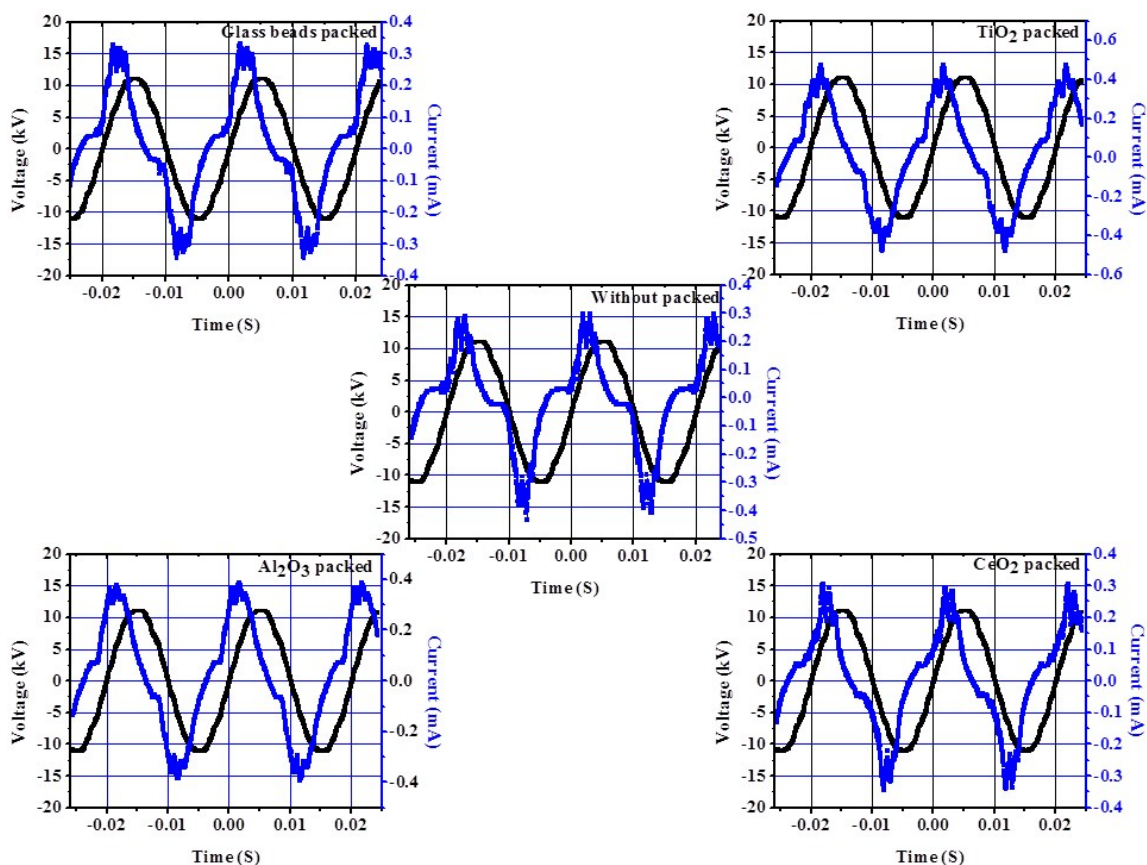

S-1: Electrical signal of DBD reactors with various packing materials (gas flow rate: 20 mL/min; without dilution; frequency: 50 Hz; applied voltage 22 kV).

The lowest current variation observed for CeO<sub>2</sub> packing was between 0.30 and -0.34 mA, whereas, for TiO<sub>2</sub> packing, it varied between 0.48 and -0.49 mA, respectively. The current dissipated in the discharge follows the order: TiO<sub>2</sub> > Al<sub>2</sub>O<sub>3</sub> > glass beads > without packing > CeO<sub>2</sub>.
